# Supplementary material for: Spatial metabolomics reveals skeletal myofiber subtypes
Source: PubMed Central journal article supplement (PMC10939097; doi:10.1126/sciadv.add0455), 2023-02-03
Supplement: sciadv.add0455_sm.pdf [file sciadv.add0455_sm.pdf]

Supplementary Materials for  
**Spatial metabolomics reveals skeletal myofiber subtypes**

Lanfang Luo *et al.*

Corresponding author: Ng Shyh-Chang, huangsq@ioz.ac.cn; Taoyan Liu, liutaoyan@ioz.ac.cn

*Sci. Adv.* **9**, eadd0455 (2023)  
DOI: 10.1126/sciadv.add0455

**The PDF file includes:**

Figs. S1 to S5  
Legends for tables S1 to S4

**Other Supplementary Materials for this manuscript includes the following:**

Tables S1 to S4

**Figure S1. Spatial distribution of acylcarnitines in fast- and slow-twitch muscles.**

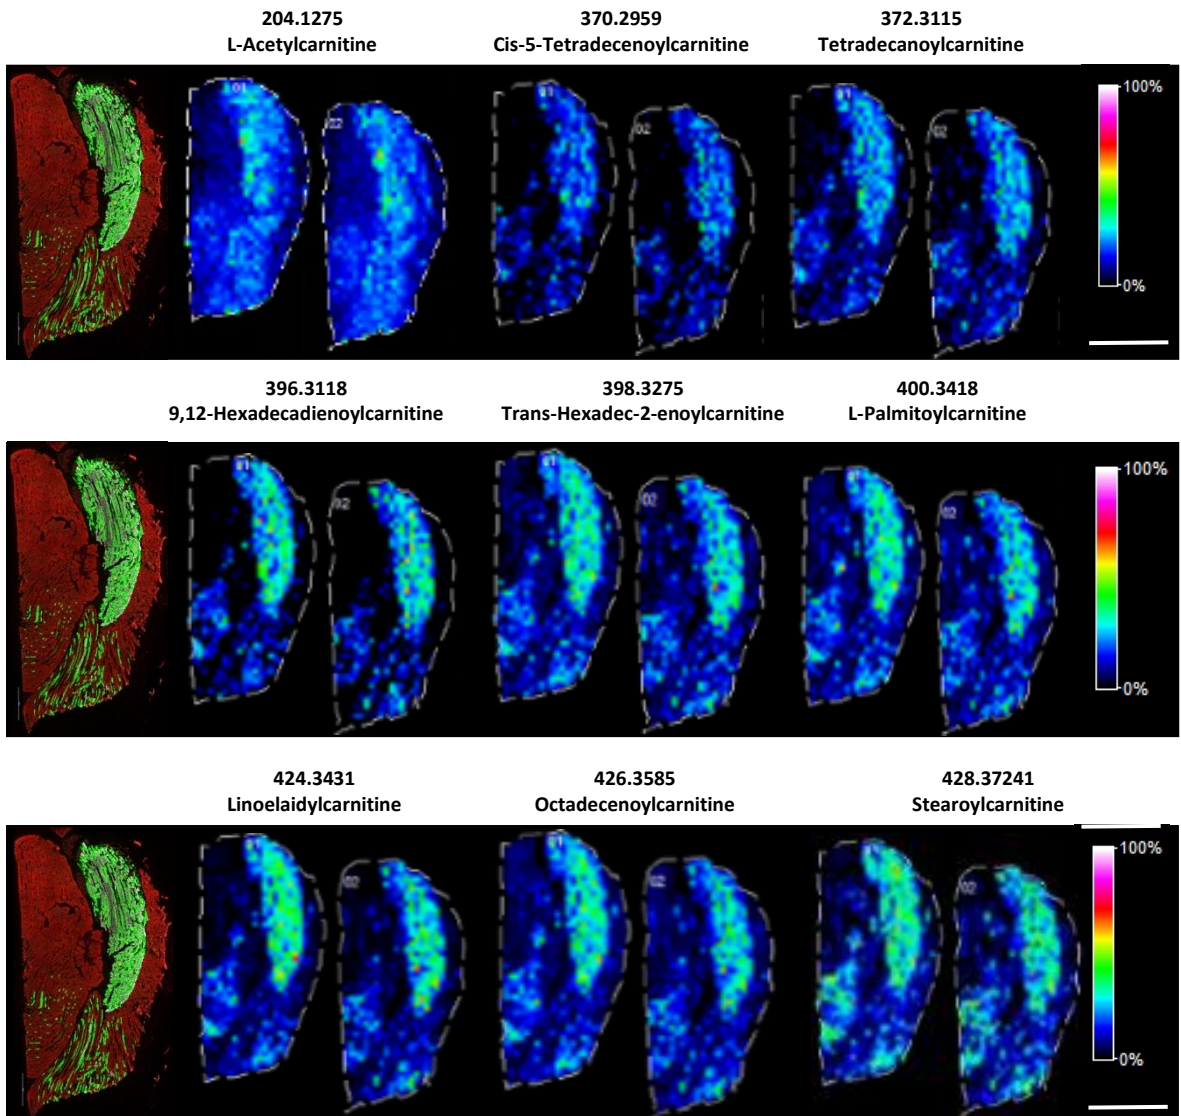

**Figure S1. Spatial distribution of acylcarnitines in fast- and slow-twitch muscles.**

Immunofluorescence staining and MSI analysis of the hindlimb's gastrocnemius and soleus muscles. Green, slow-twitch myofiber. Red, fast-twitch myofiber. Scale bar, 2.5mm.

Figure S2. On tissue MS/MS of three fingerprint metabolites with discriminative spatial distributions in the muscles.

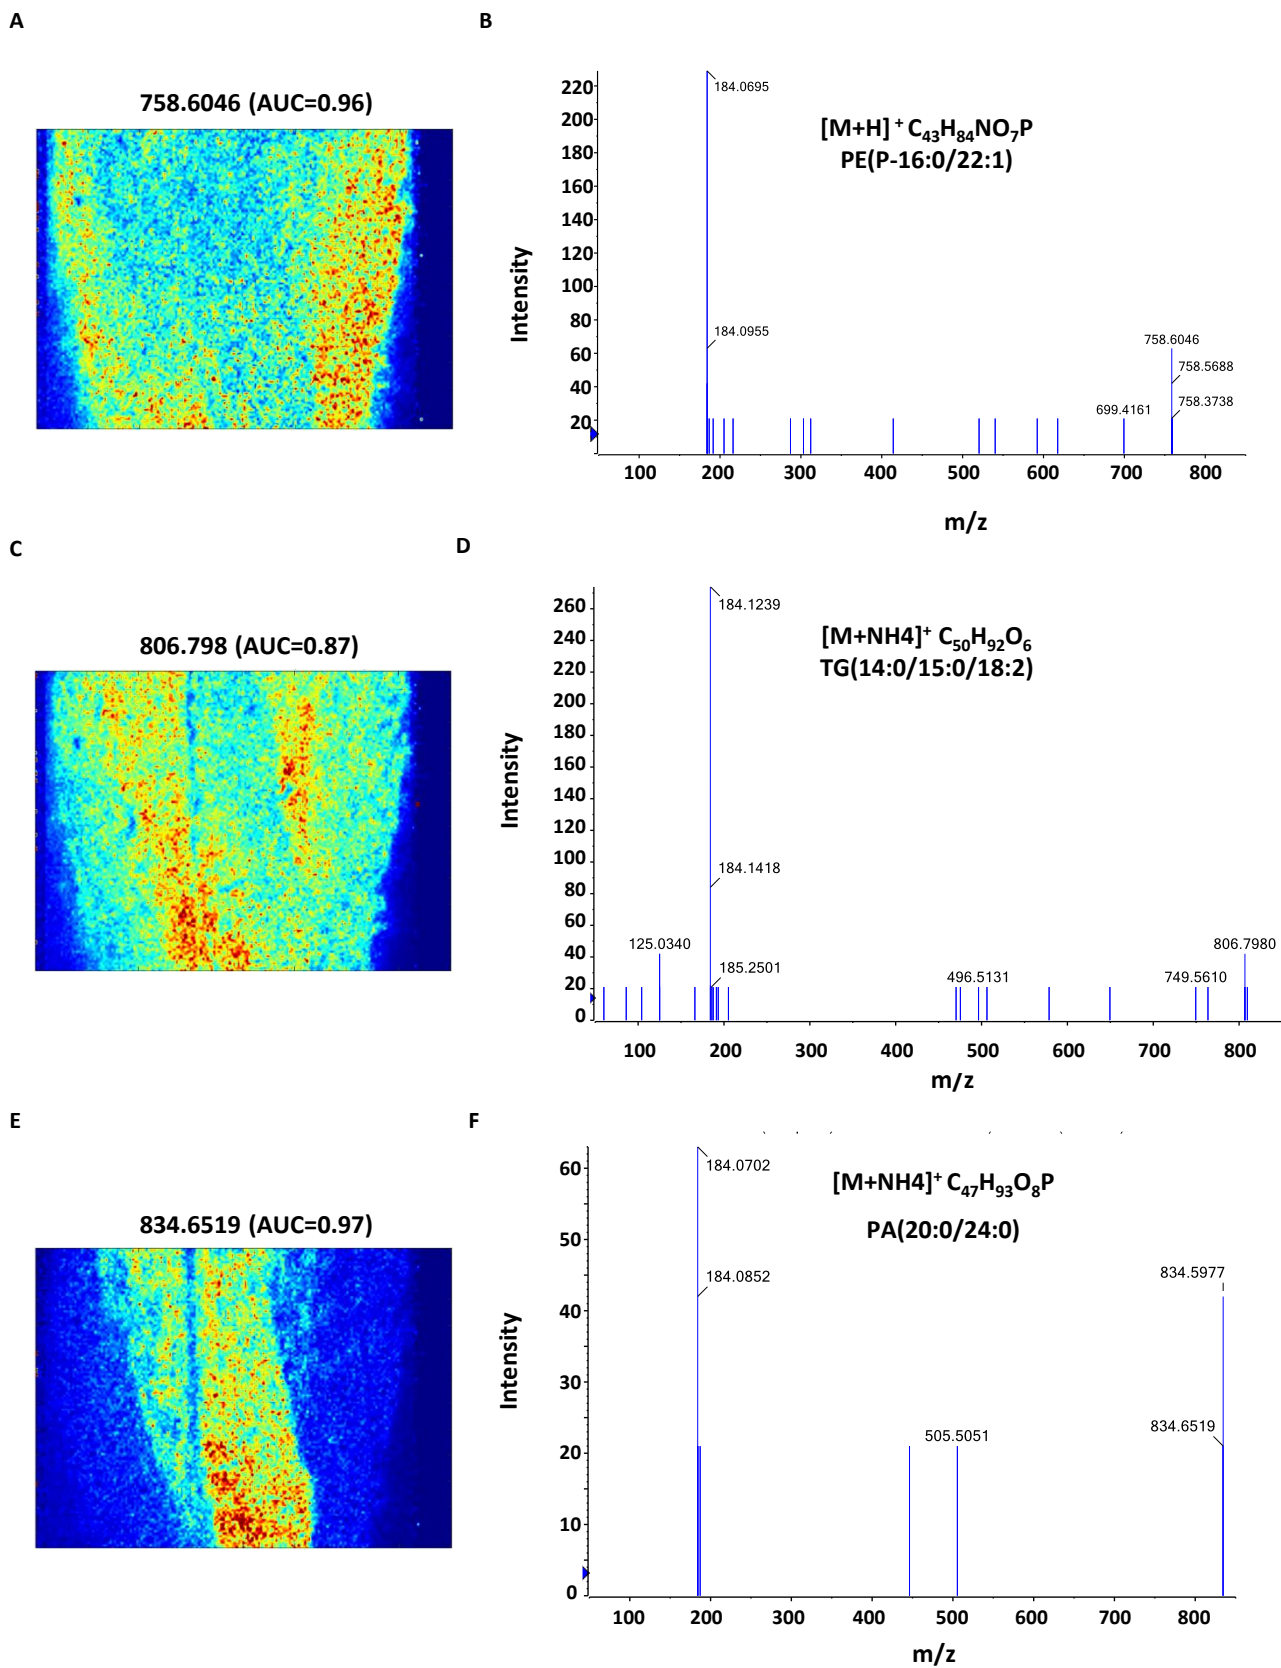

**Figure S2. On tissue MS/MS of three fingerprint metabolites with discriminative spatial distributions in the muscles.**

**A, C, E.** Mass spectrometry imaging of **(A)** 758.6046, **(C)** 806.798 and **(E)** 834.6519 in longitudinal cryosections of gastrocnemius-soleus (gas-sol) muscle. 758.6046: AUC=0.96, ICC=0.83, p-value<0.001, N=24; 806.798: AUC=0.87, ICC=0.92, p-value=0.009, N=24; 834.6519: AUC=1, ICC=0.97, p-value<0.001, N=24. AUC: the area under the receiver operating characteristic curve measures the discrimination quality. An AUC near 0.0 or 1.0 means a good discrimination with high intensities of spectra in one class, while an AUC near 0.5 means poor discrimination.

**B, D, F.** MS/MS product ion spectrum of **(B)** 758.6046, **(D)** 806.798 and **(F)** 834.6519 in longitudinal cryosections of gas-sol muscle. The formulae of 758.6046, 806.798 and 834.6519 were identified by the formula finder of the Peakview software based on accurate mass, isotope distribution and fragments. The formulae of 758.6046, 806.798 and 834.6519 are C<sub>43</sub>H<sub>84</sub>NO<sub>7</sub>P, C<sub>50</sub>H<sub>92</sub>O<sub>6</sub>, C<sub>47</sub>H<sub>93</sub>O<sub>8</sub>P, corresponding to their [M+H]<sup>+</sup>, [M+NH<sub>4</sub>]<sup>+</sup> and [M+NH<sub>4</sub>]<sup>+</sup> ions, respectively. The metabolites identified by database searching and spectral matching for 758.6046, 806.798 and 834.6519 are PE (P-16:0/22:1), TG (14:0/15:0/18:2), and PA (20:0/24:0), respectively.

Figure S3. LC-MS quality control with PCA, and biomarker selection with PLS-DA.

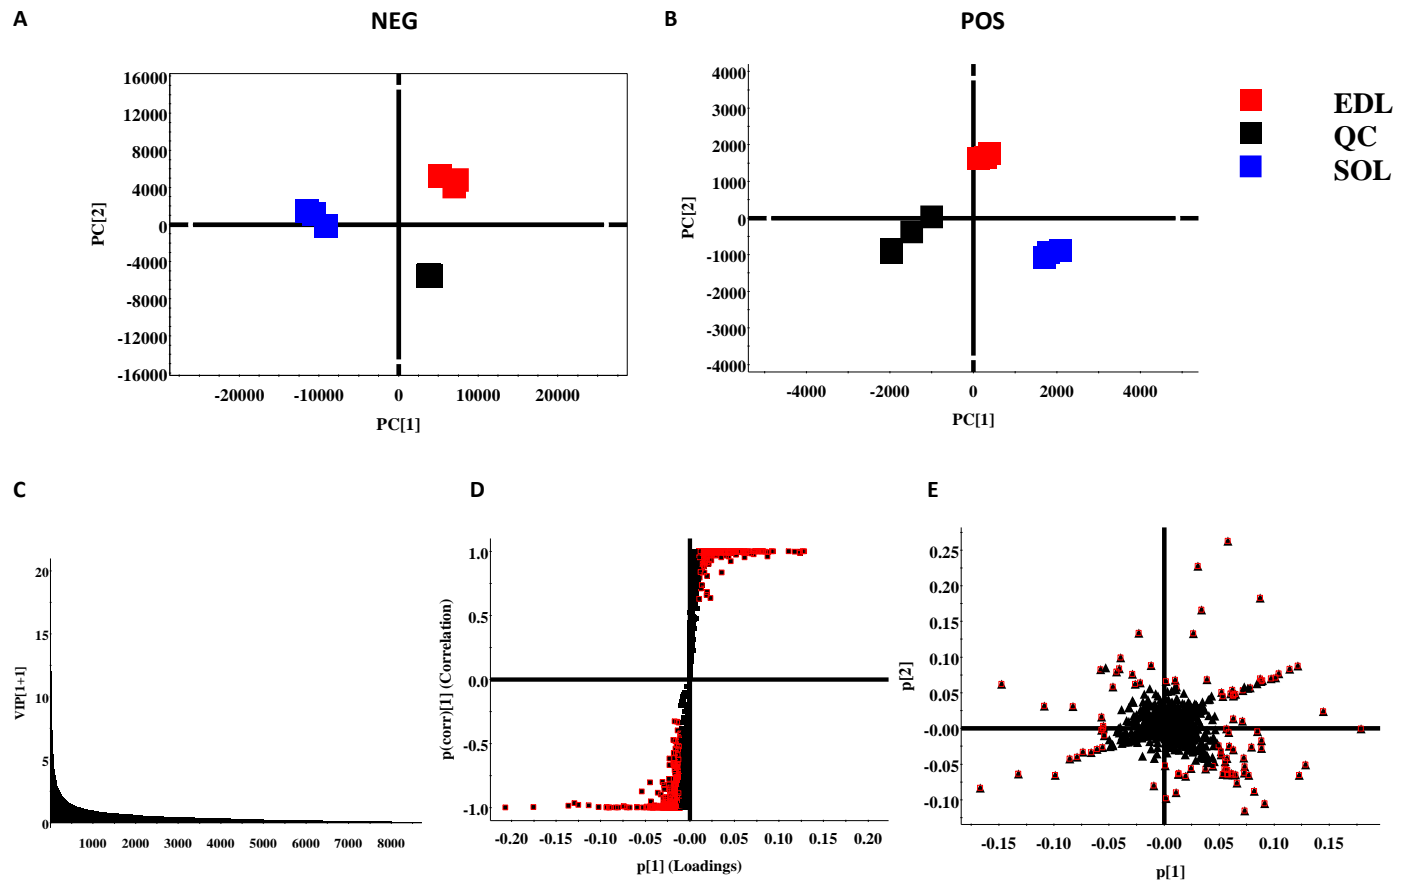

Figure S3. LC-MS quality control with PCA, and biomarker selection with PLS-DA.

**A,B.** Principal component analysis (PCA) shows the distributions of quality control (QC), EDL and SOL samples in **(A)** negative ion mode, and **(B)** positive ion mode.

**C,D,E.** Metabolite biomarkers in EDL and SOL (Table 3) according to the orthogonal partial least squares discriminant analysis (PLS-DA) regression model and the derived (C) Variable importance in the Project (VIP) values, (D) S-plot and (E) loading plot, analyzed by Progenesis Q1 and Ezinfo software. Cutoff loading scores  $\geq 0.05$  and VIP scores  $\geq 1$  were used. The S-plot visualizes the modeled covariance (X-axis) and modeled correlation (Y-axis) from the PLS-DA on a scatter plot, allowing for selection of metabolites as biomarkers. Metabolites located far from the origin represent importance in the model, i.e. the red dots have VIP scores  $\geq 1$ . The X-axis and Y-axis of the loading plot represent the coefficient weights of the metabolites along the two predictive components derived from the PLS-DA model.

Figure S4. Segmentation analysis of high spatial resolution MSI.

A

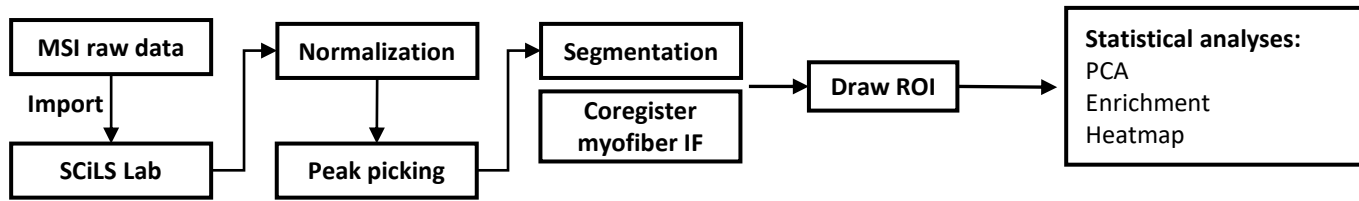

B

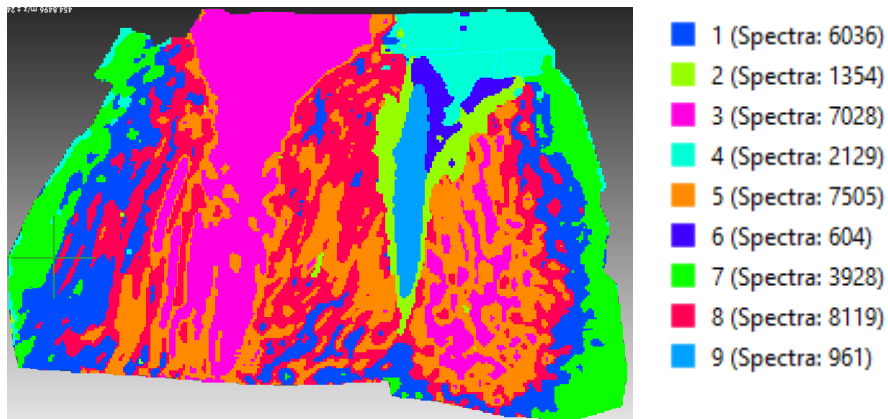

C

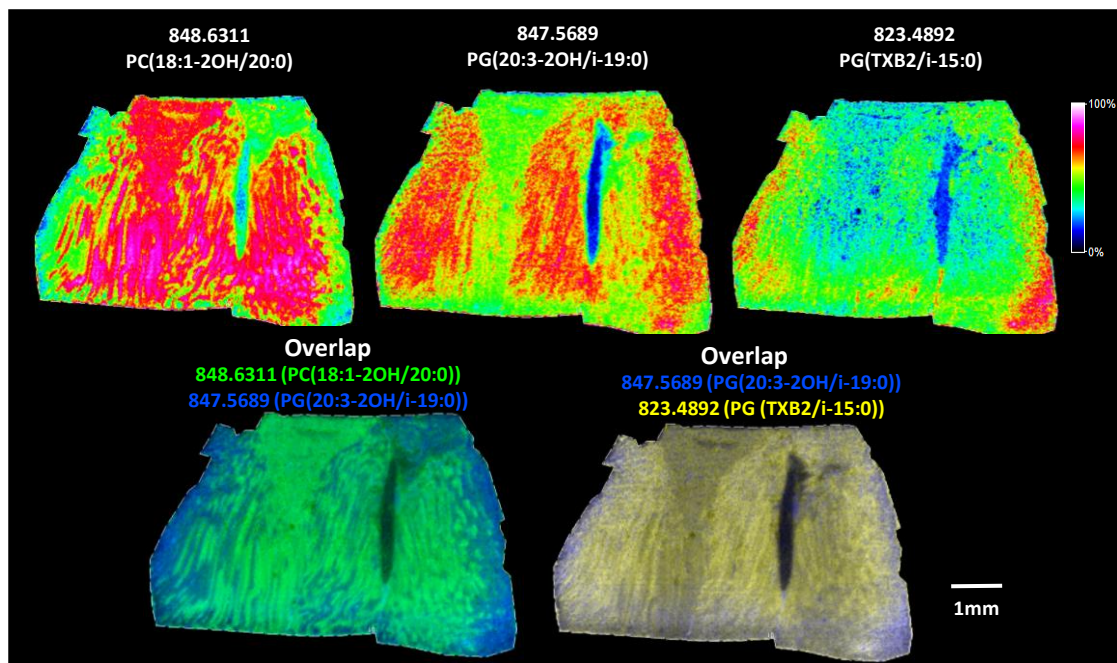

D

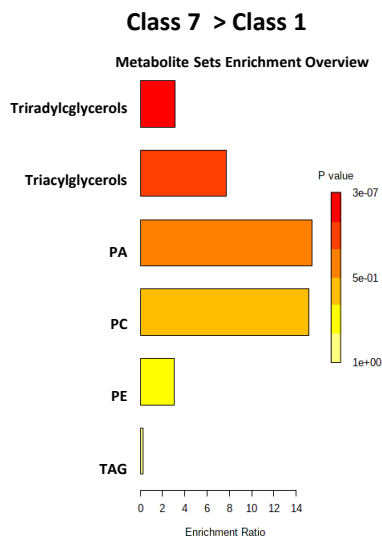

E

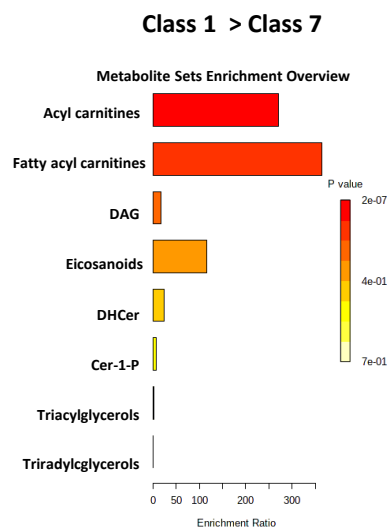

## Figure S4. Segmentation analysis of high spatial resolution MSI.

**A.** Spatial metabolomic analysis workflow for muscle fiber MSI and immunofluorescence (IF) data. For details, see main text and Material and Methods section.

**B.** 9 clusters were obtained by segmentation analysis, and the number of m/z spectra that define each cluster is shown.

**C.** Overlap between MS images of oxidative and glycolytic myofiber fingerprint metabolites, where m/z 848.6311 can mark the type 1/2a oxidative (class 3) myofibers, m/z 847.5689 and m/z 823.4892 can mark the type 2b glycolytic (class 1 and 7) myofibers respectively. Scale bar, 1mm.

**D,E.** MSEA<sup>Lipid</sup> of differentially abundant lipids from type 2b mito<sup>high</sup> (class 1) and type 2b mito<sup>low</sup> (class 7). MSEA of significantly upregulated lipids in **(D)** type 2b mito<sup>low</sup> (class 7) myofibers (Triradylclycerols: p<0.001; Triacylglycerols: p<0.001; PA: p<0.001; PC: p<0.001) and **(E)** type 2b mito<sup>high</sup> (class 1) myofibers (Acyl carnitines: p<0.001; Fatty acyl carnitines: p<0.001; DAG: p=0.005; Eicosanoids: p=0.009; DHCer: p=0.004). Bonferroni-corrected p-values were calculated using the QEA module of Metaboanalyst MSEA, based on the globaltest algorithm and a generalized linear model to estimate the Q-stat for each metabolite set.

Figure S5. LCM-RNAseq analysis of specific muscle fibers.

A

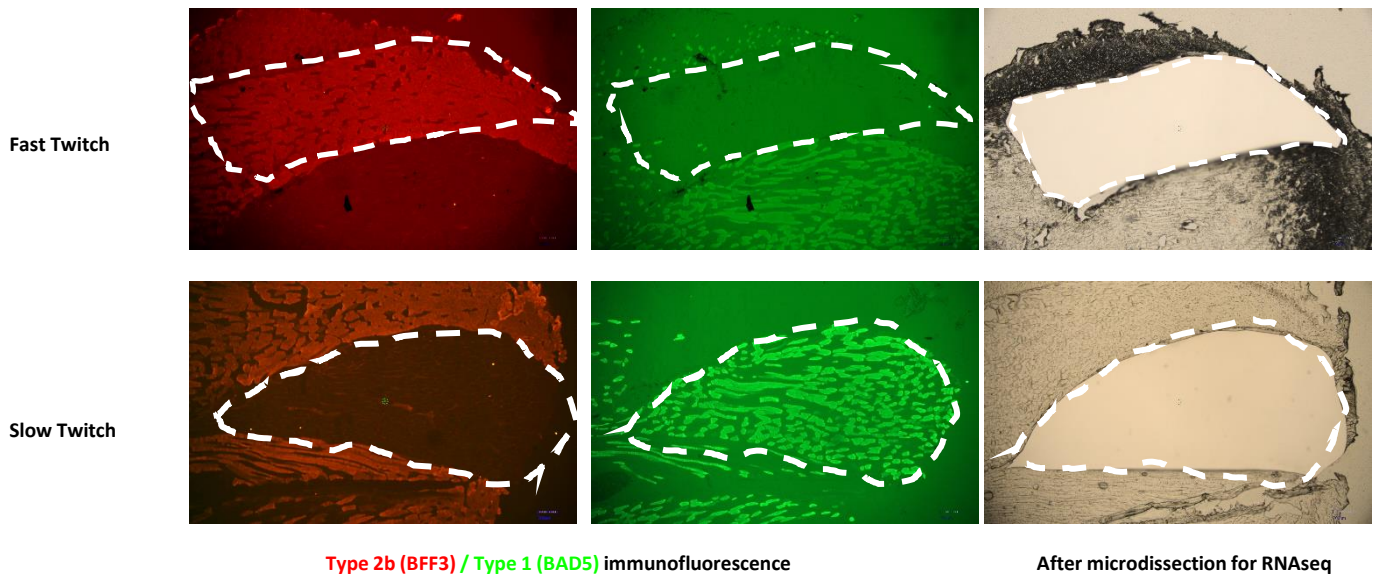

B

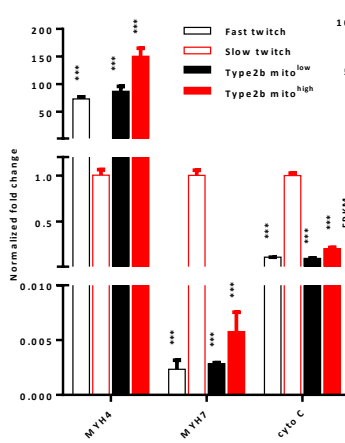

C

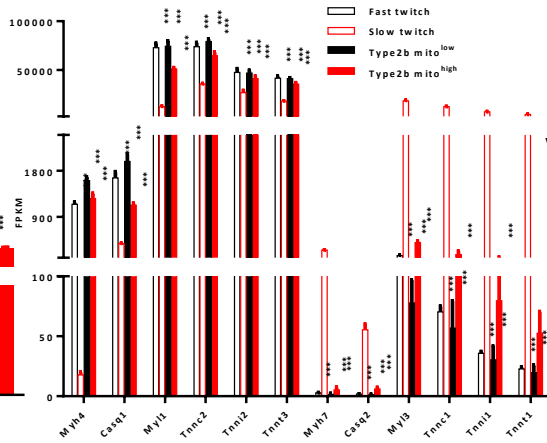

D

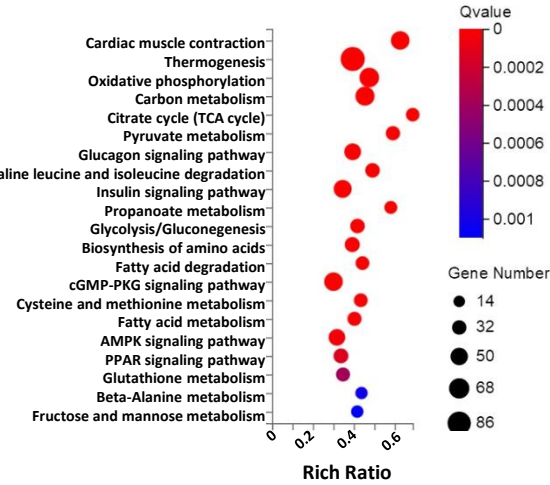

E

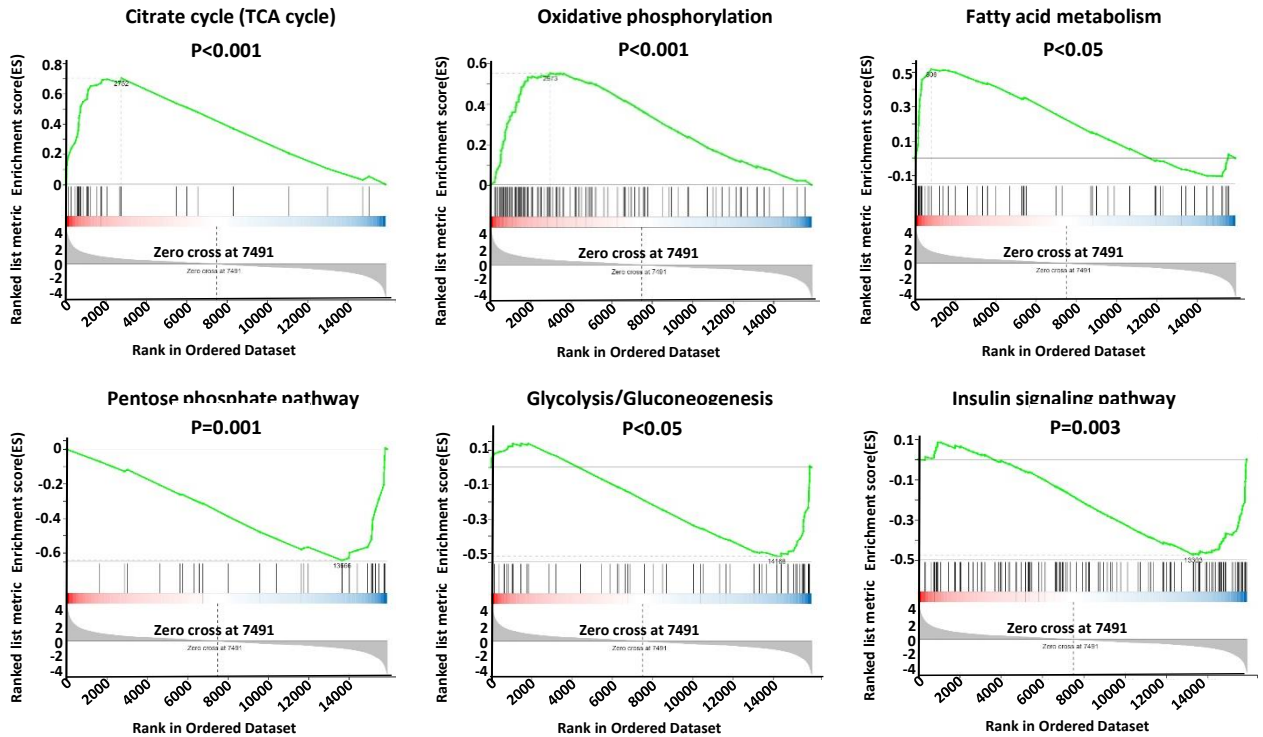



## Figure S5. LCM-RNAseq analysis of specific muscle fibers.

**A.** Laser capture microdissection (LCM), in comparison with immunofluorescence images, accurately isolates gastrocnemius fast-twitch and soleus slow-twitch myofibers for RNAseq.

**B.** Quantitative real-time PCR (qRT-PCR) for Myh4, Myh7 and cytochrome C gene expression in fast-twitch, slow-twitch, type 2b mito<sup>high</sup> and type 2b mito<sup>low</sup> myofibers' RNA samples.

(Mean±SEM, \*\*\*p<0.001, Student's t test).

**C.** Transcript abundance of fast-twitch myofiber markers (Myh4-Tnnt3) and slow-twitch myofiber markers (Myh7-Tnnt1). FPKM indicates Fragments Per Kilobase of transcript per Million fragments mapped in RNAseq (Mean±SEM, \*\*\*p<0.001, Student's t test).

**D.** Bubble chart of KEGG pathway enrichment analysis of differentially expressed genes (DEGs) in the slow-twitch myofibers, relative to fast-twitch myofibers. The Q-value is the corrected Fisher exact test p-value. Rich ratio refers to the ratio of the number of differential genes enriched in the pathway to the number of annotated genes. The greater the Rich ratio, the greater the degree of enrichment.

**E.** Gene Set Enrichment Analysis (GSEA) of the transcriptome of slow-twitch myofibers, relative to fast-twitch myofibers. GSEA signatures for the TCA cycle, Oxidative phosphorylation, and Fatty acid metabolism were significantly enriched in slow-twitch myofibers. GSEA signatures for the Pentose phosphate pathway, Glycolysis/Gluconeogenesis and Insulin signaling pathway were significantly enriched in fast-twitch myofibers. FWER-adjusted P-values for the GSEA test are calculated by permutation of statistics based on the Kolmogorov-Smirnov test.

## **Supplementary Tables**

**Table S1.** Reproducibility of fingerprint metabolites by MSI

**Table S2.** Intersection of MALDI v.s. APMALDI

**Table S3.** Fingerprints of fast- and slow-twitch myofibers

**Table S4.** Intersection of MSI v.s. LC-MS
